# Supplementary material
Source: ML conference proceedings conference paper supplement (https://openreview.net/forum?id=bQNG7HAs8sX)
Supplement: supplementary_material [file attachment]

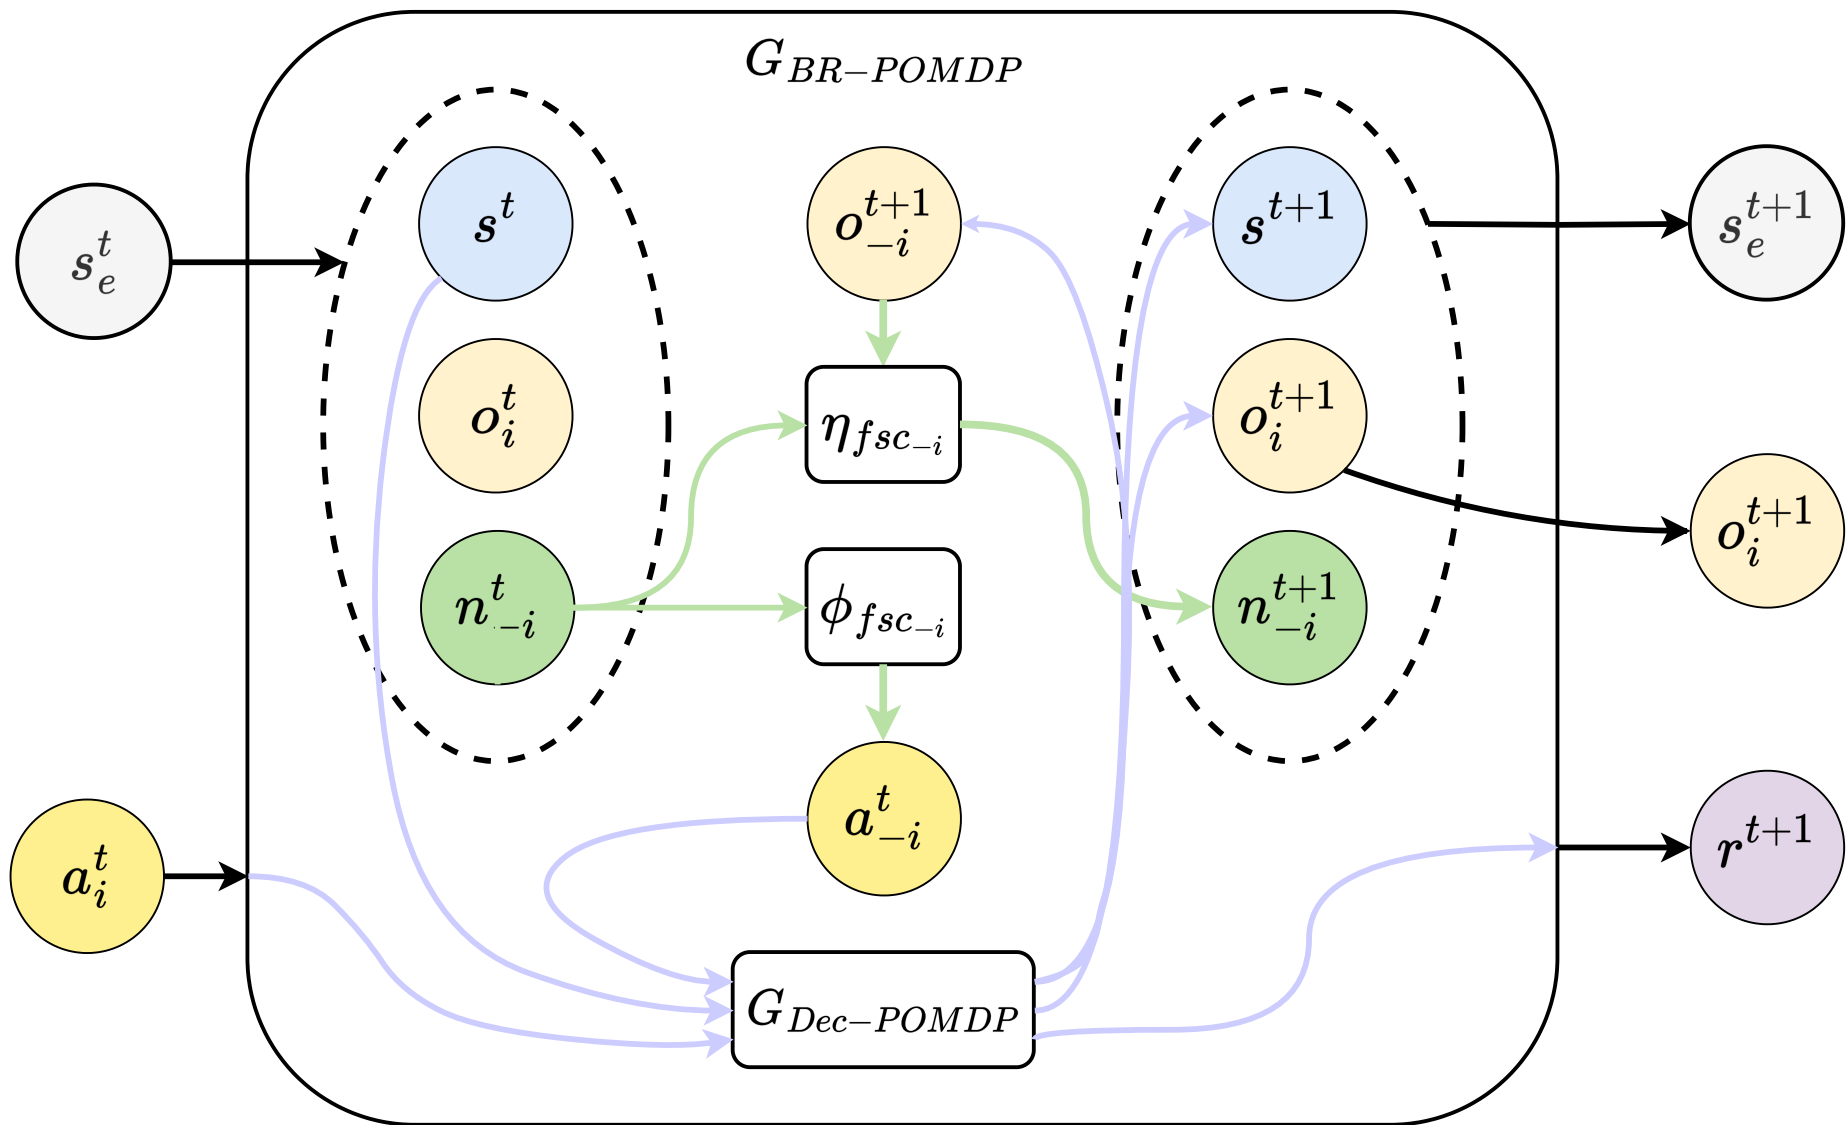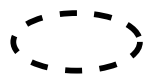

Extended State

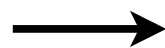

Best-Response Generative Model

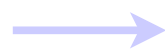

Dec-POMDP Generative Model

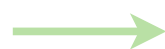

Other Agents' FSCs

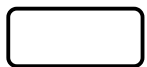

Functions
