# Supplementary material
Source: ML conference proceedings conference paper supplement (https://openreview.net/forum?id=bQNG7HAs8sX)

# Box-Pushing

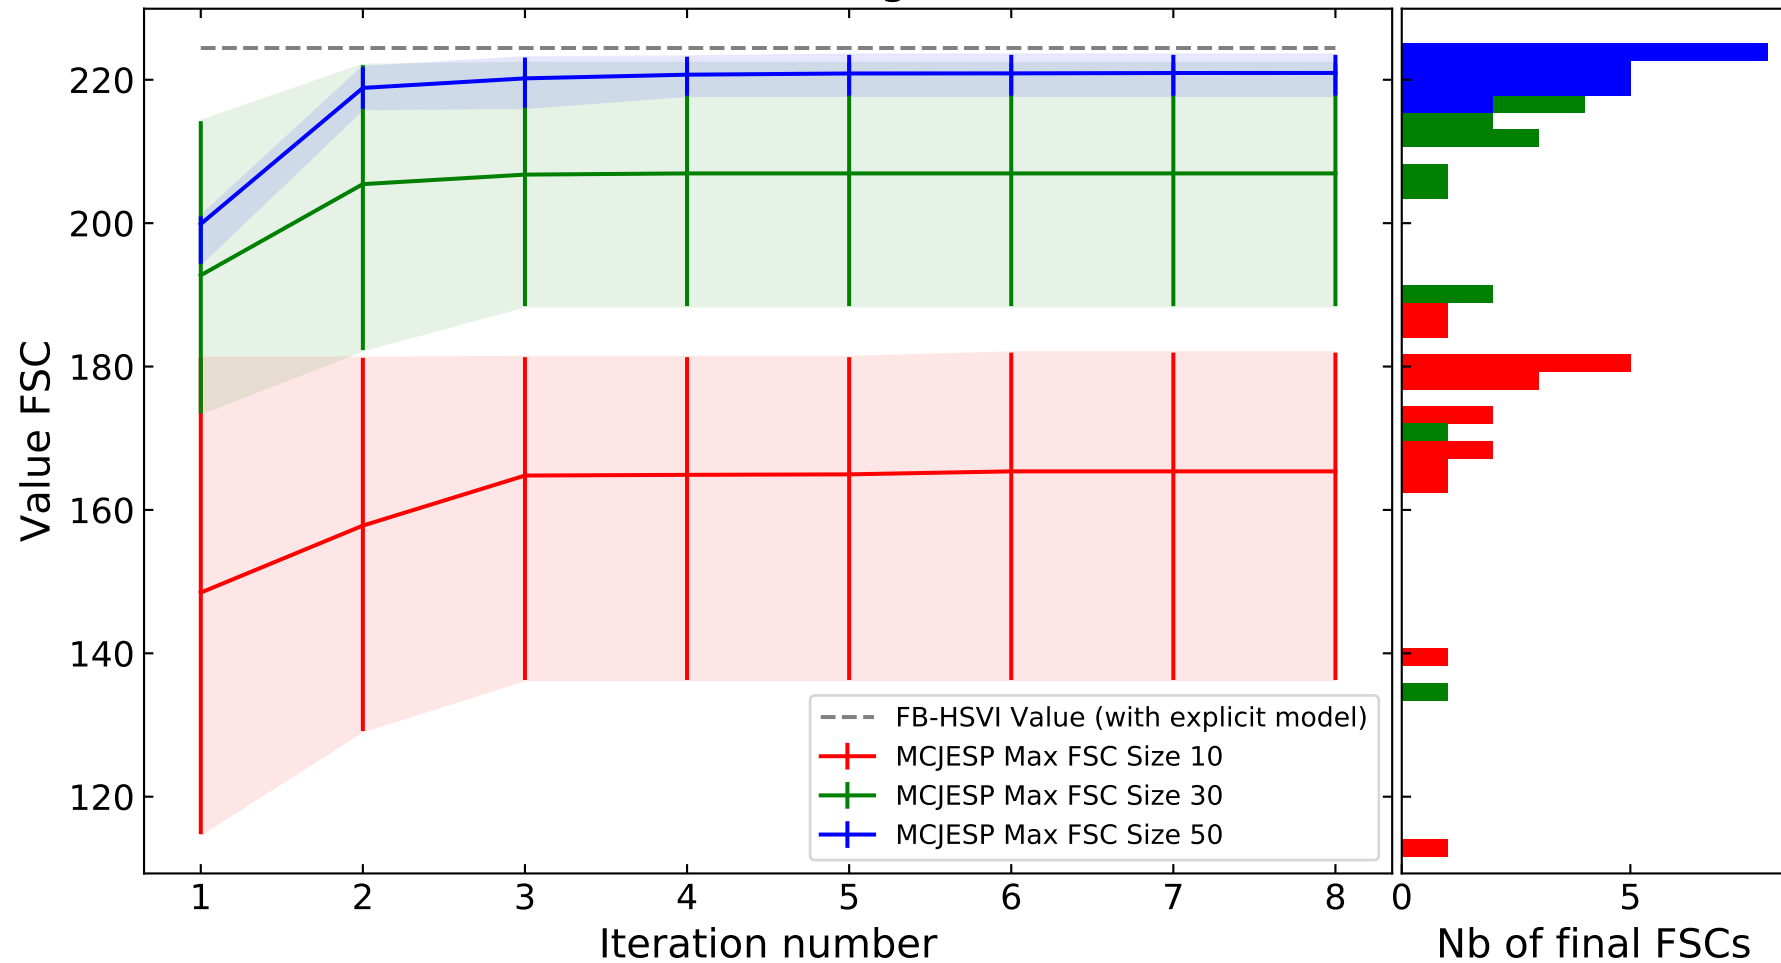

Supplement: supplementary_material [file attachment]

# DecTiger

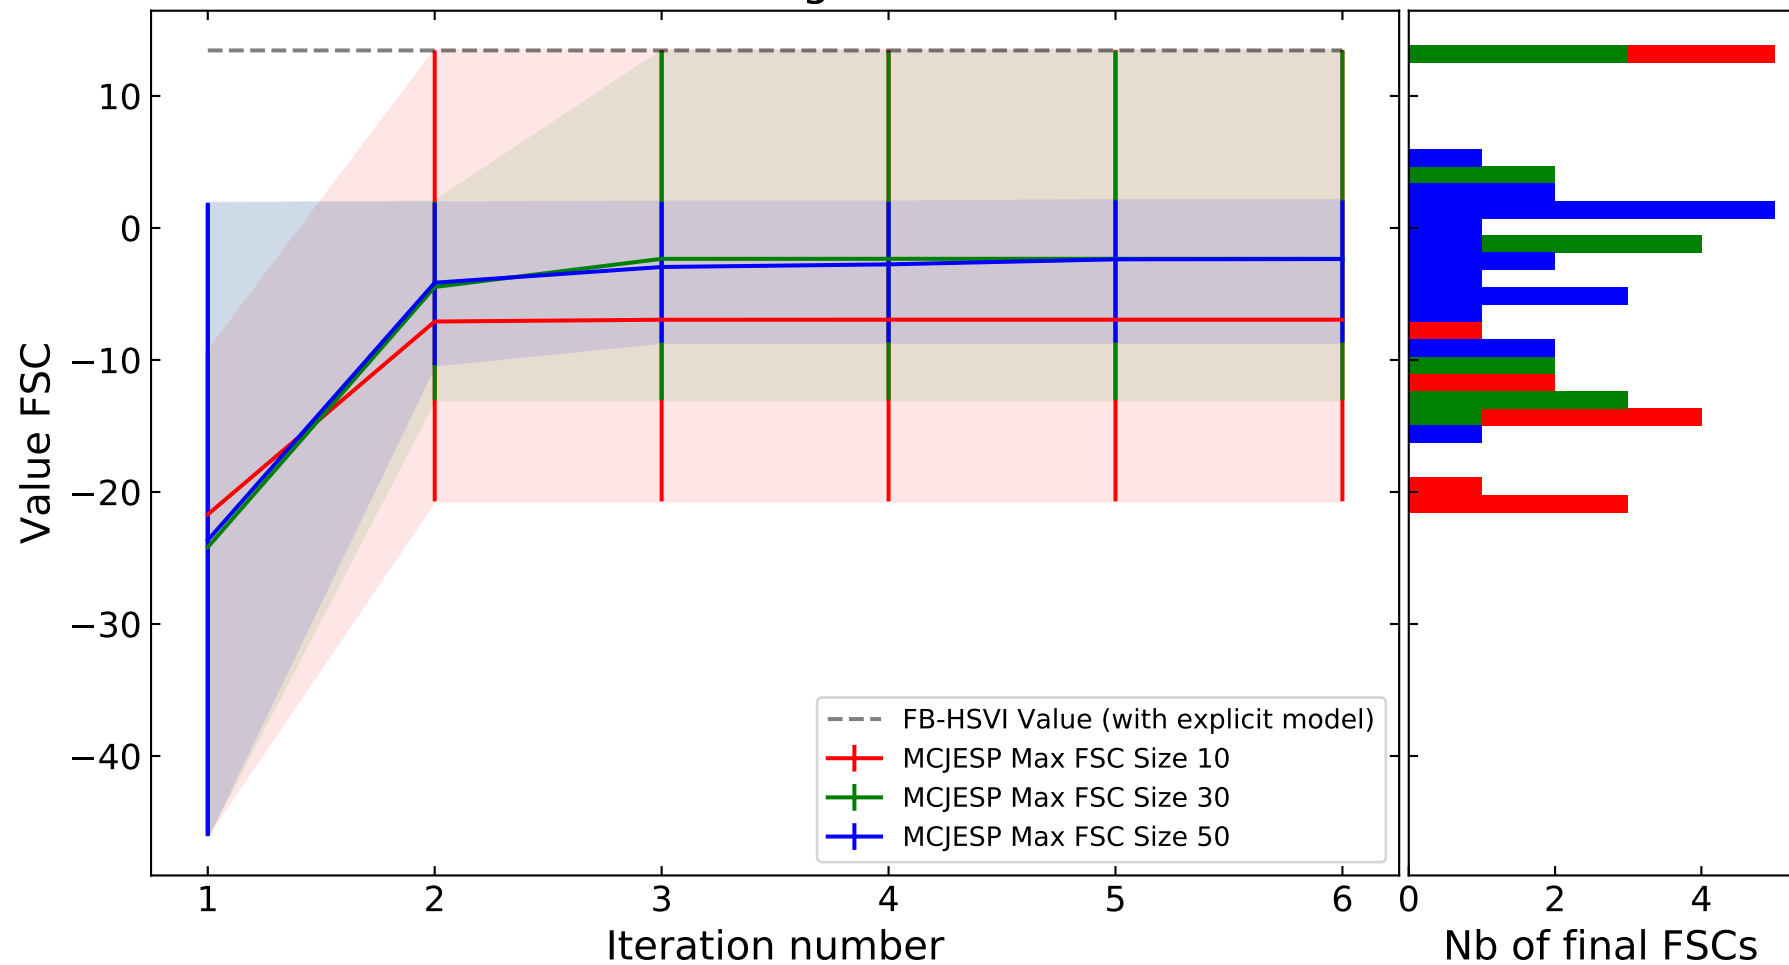

Supplement: supplementary_material [file attachment]

# Mars Rovers

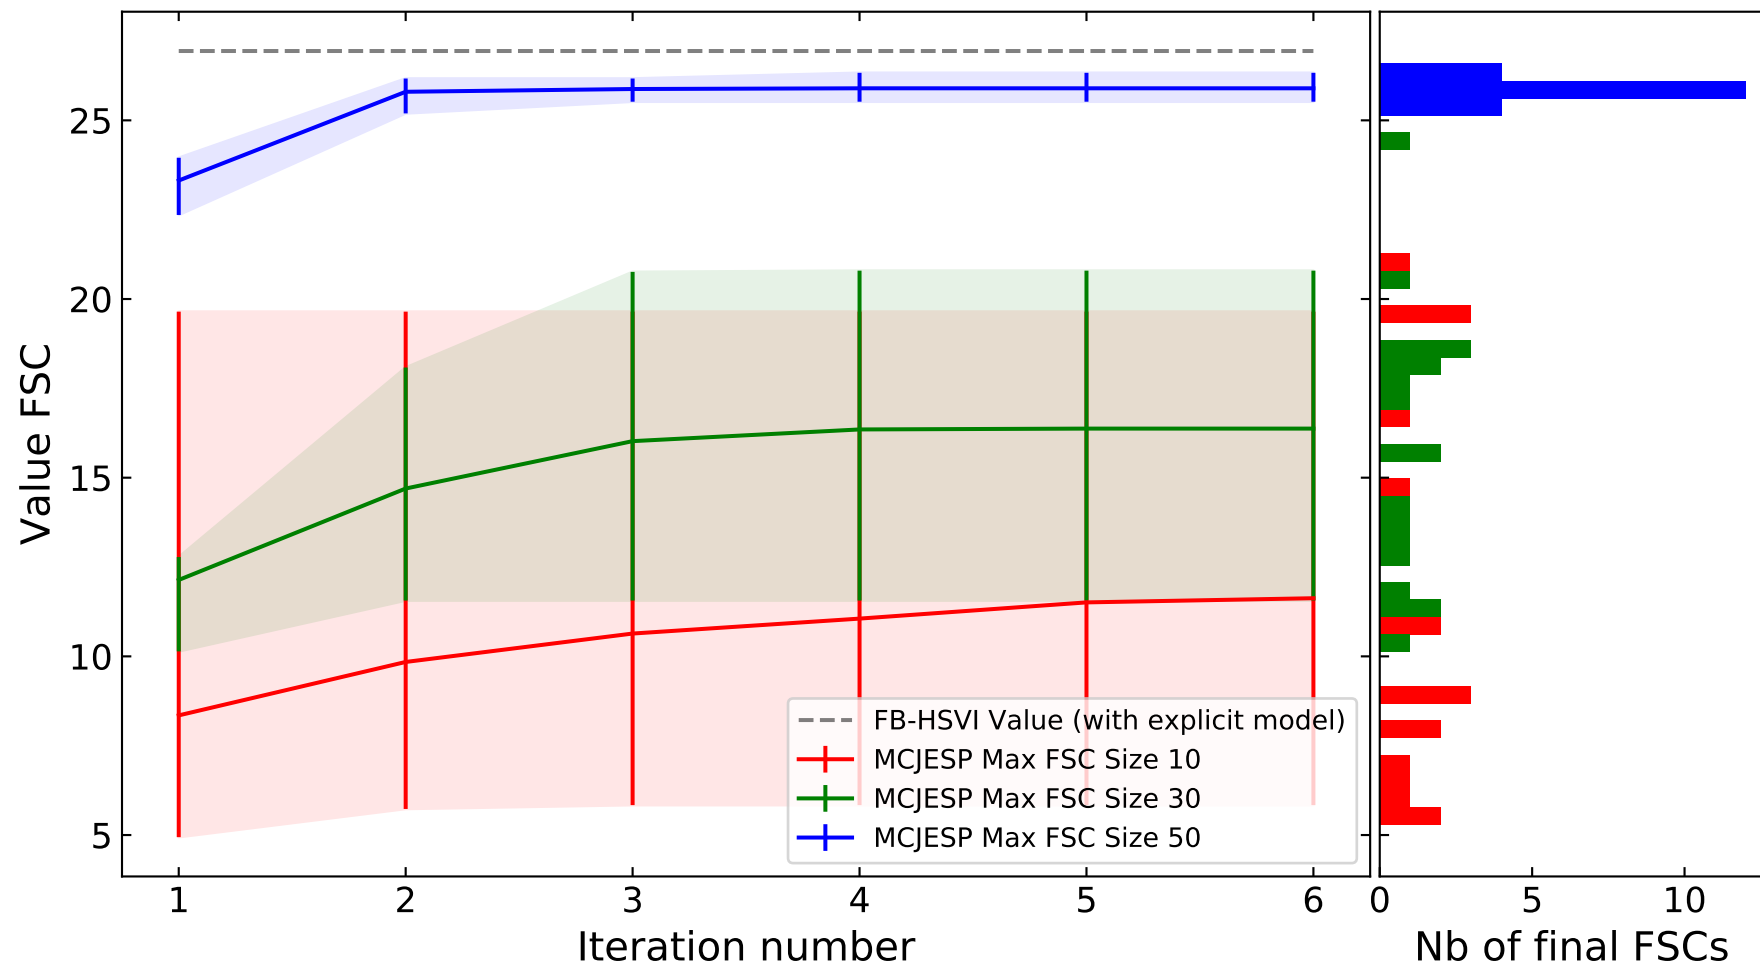

Supplement: supplementary_material [file attachment]

Grid

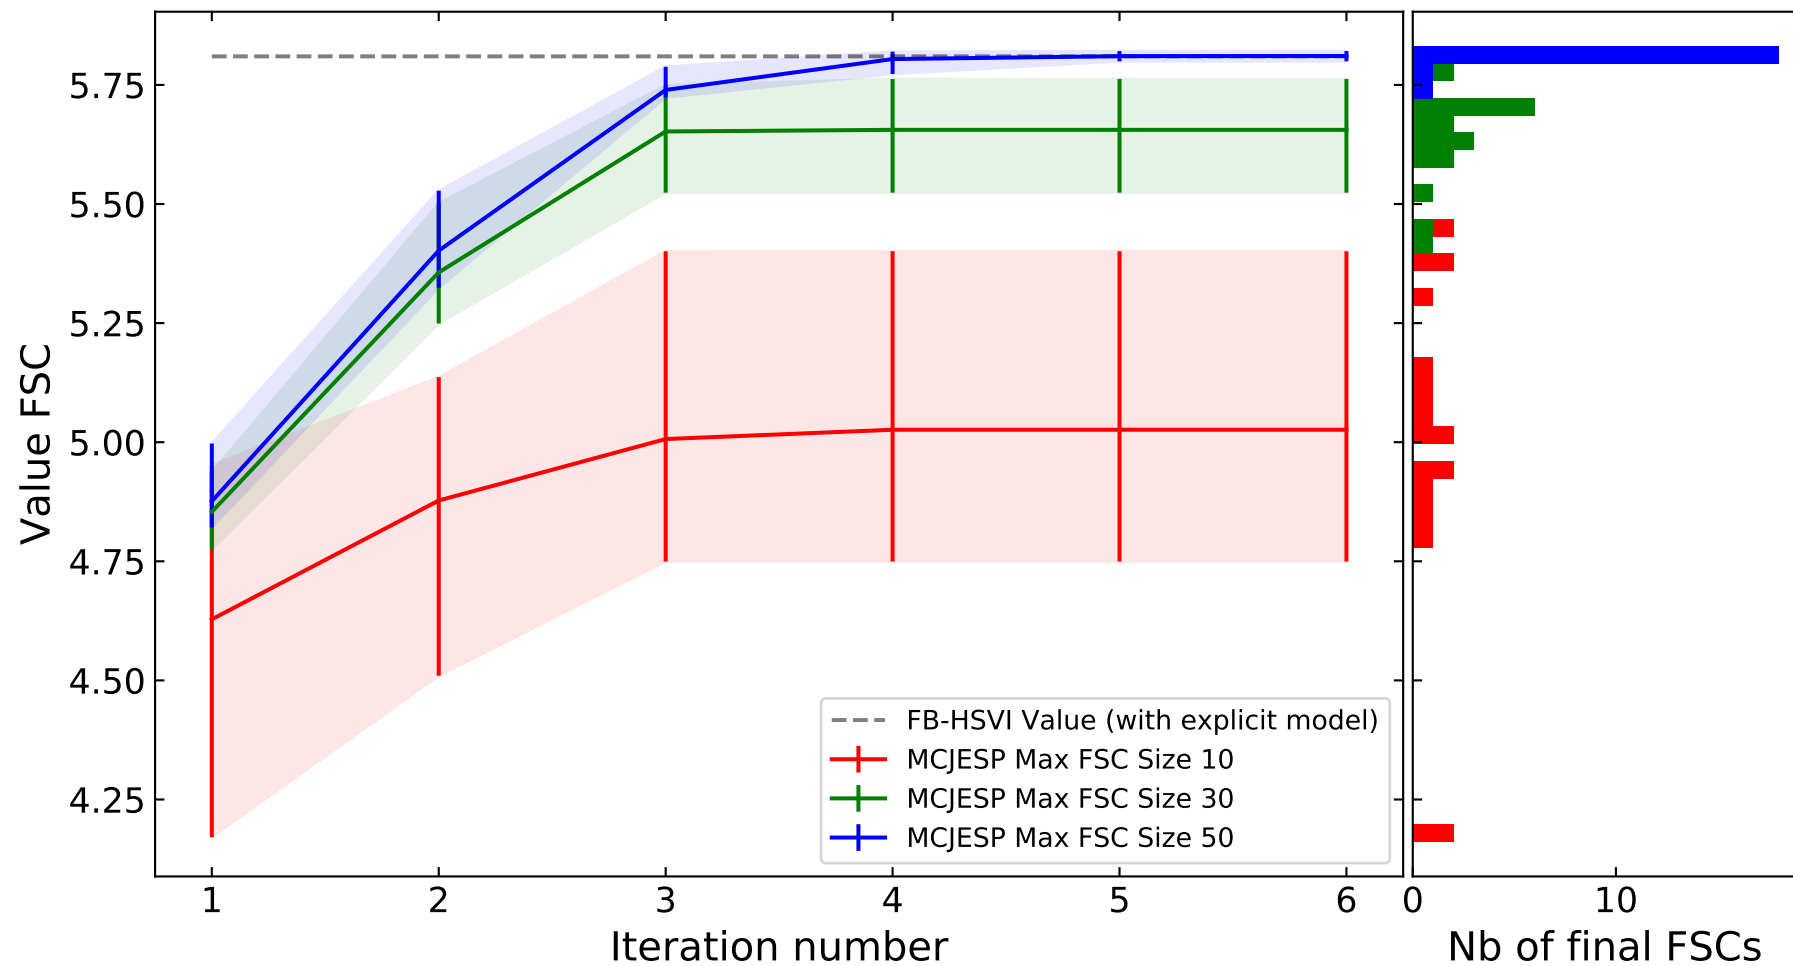

Supplement: supplementary_material [file attachment]

Avg Final Values for DecTiger

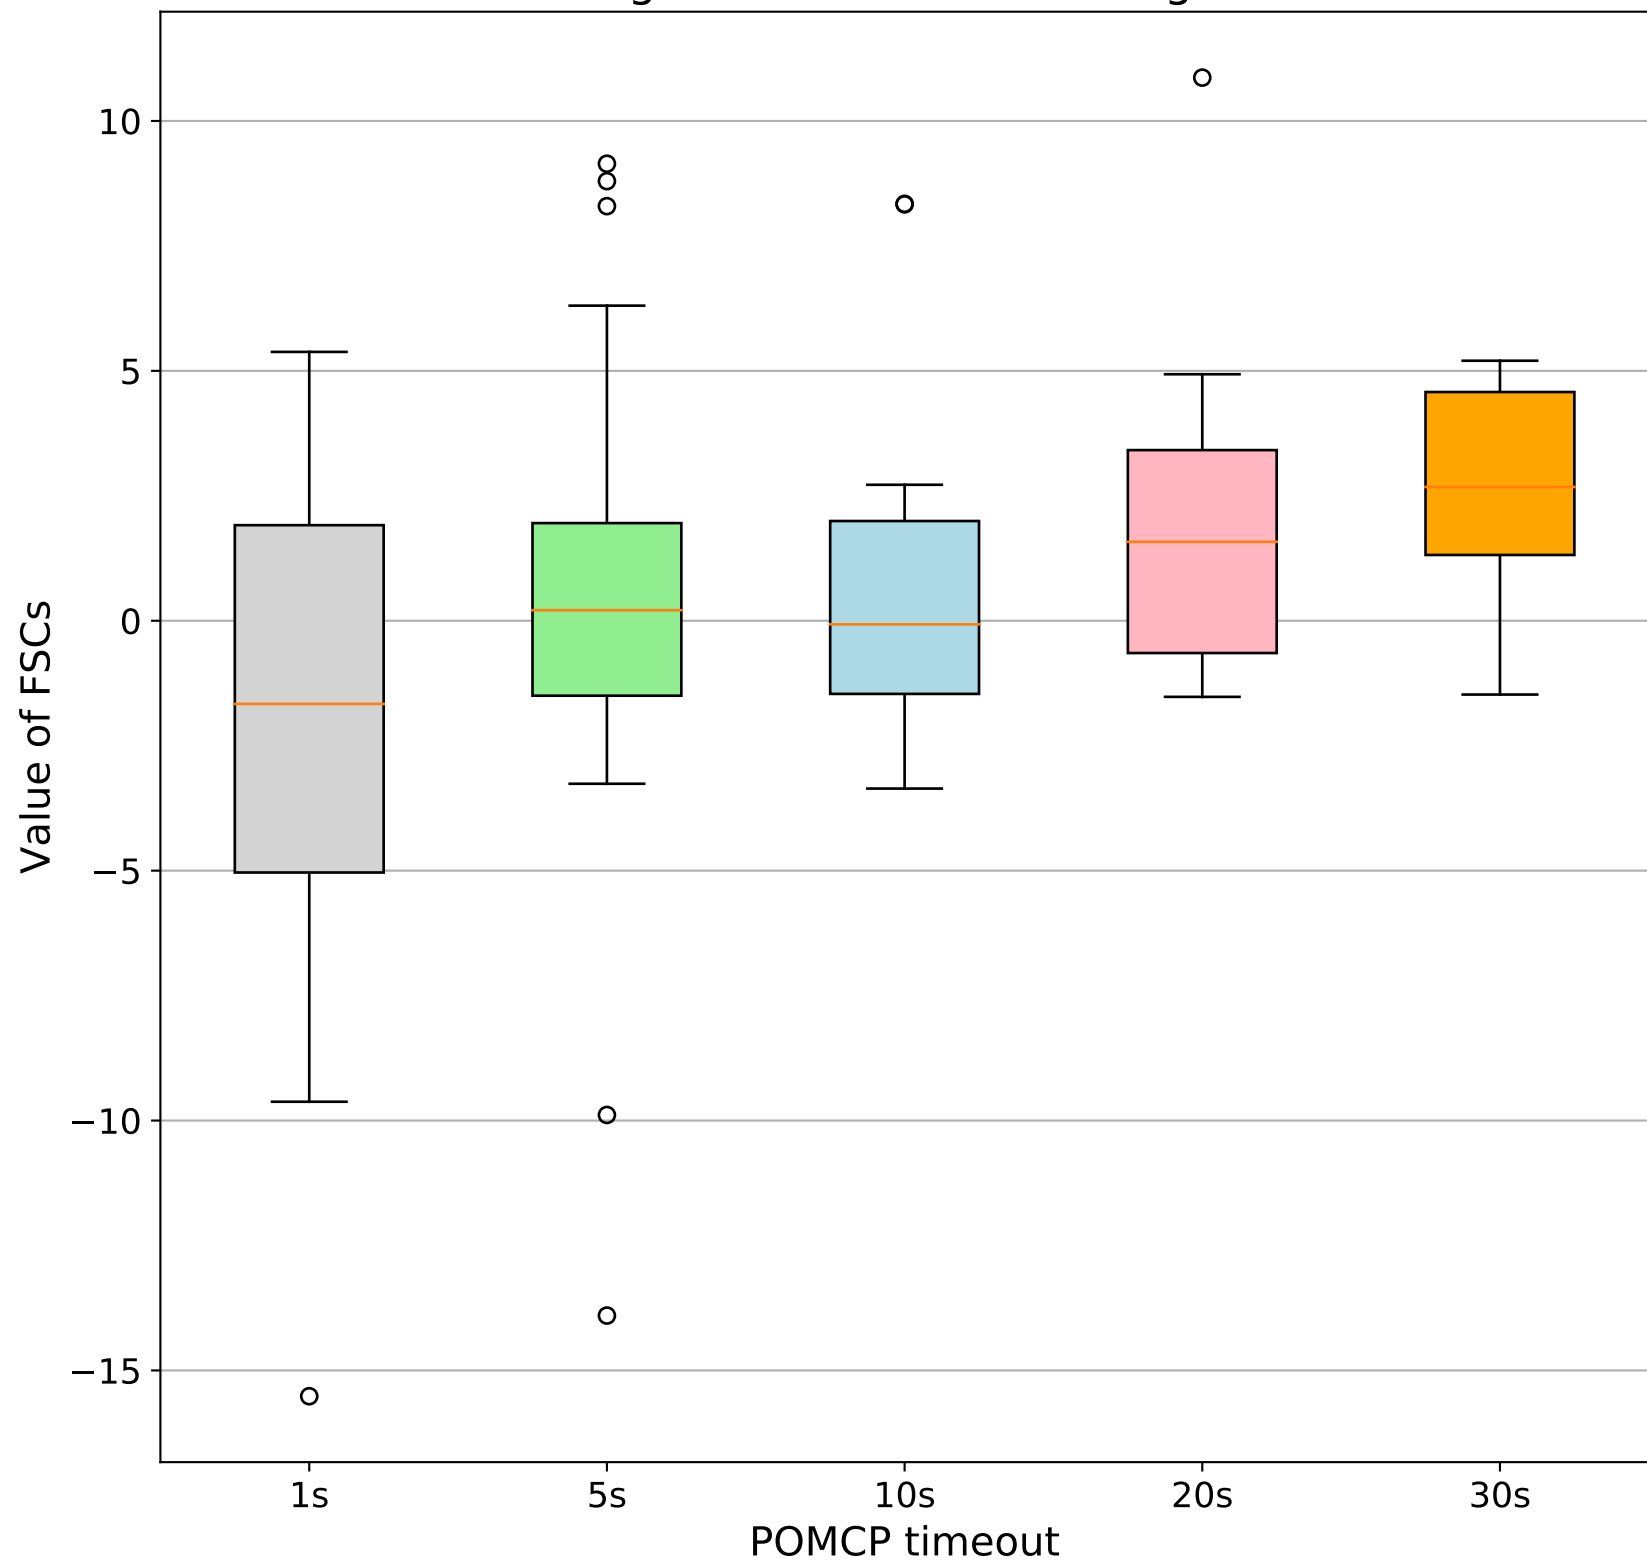

Supplement: supplementary_material [file attachment]

# Recycling

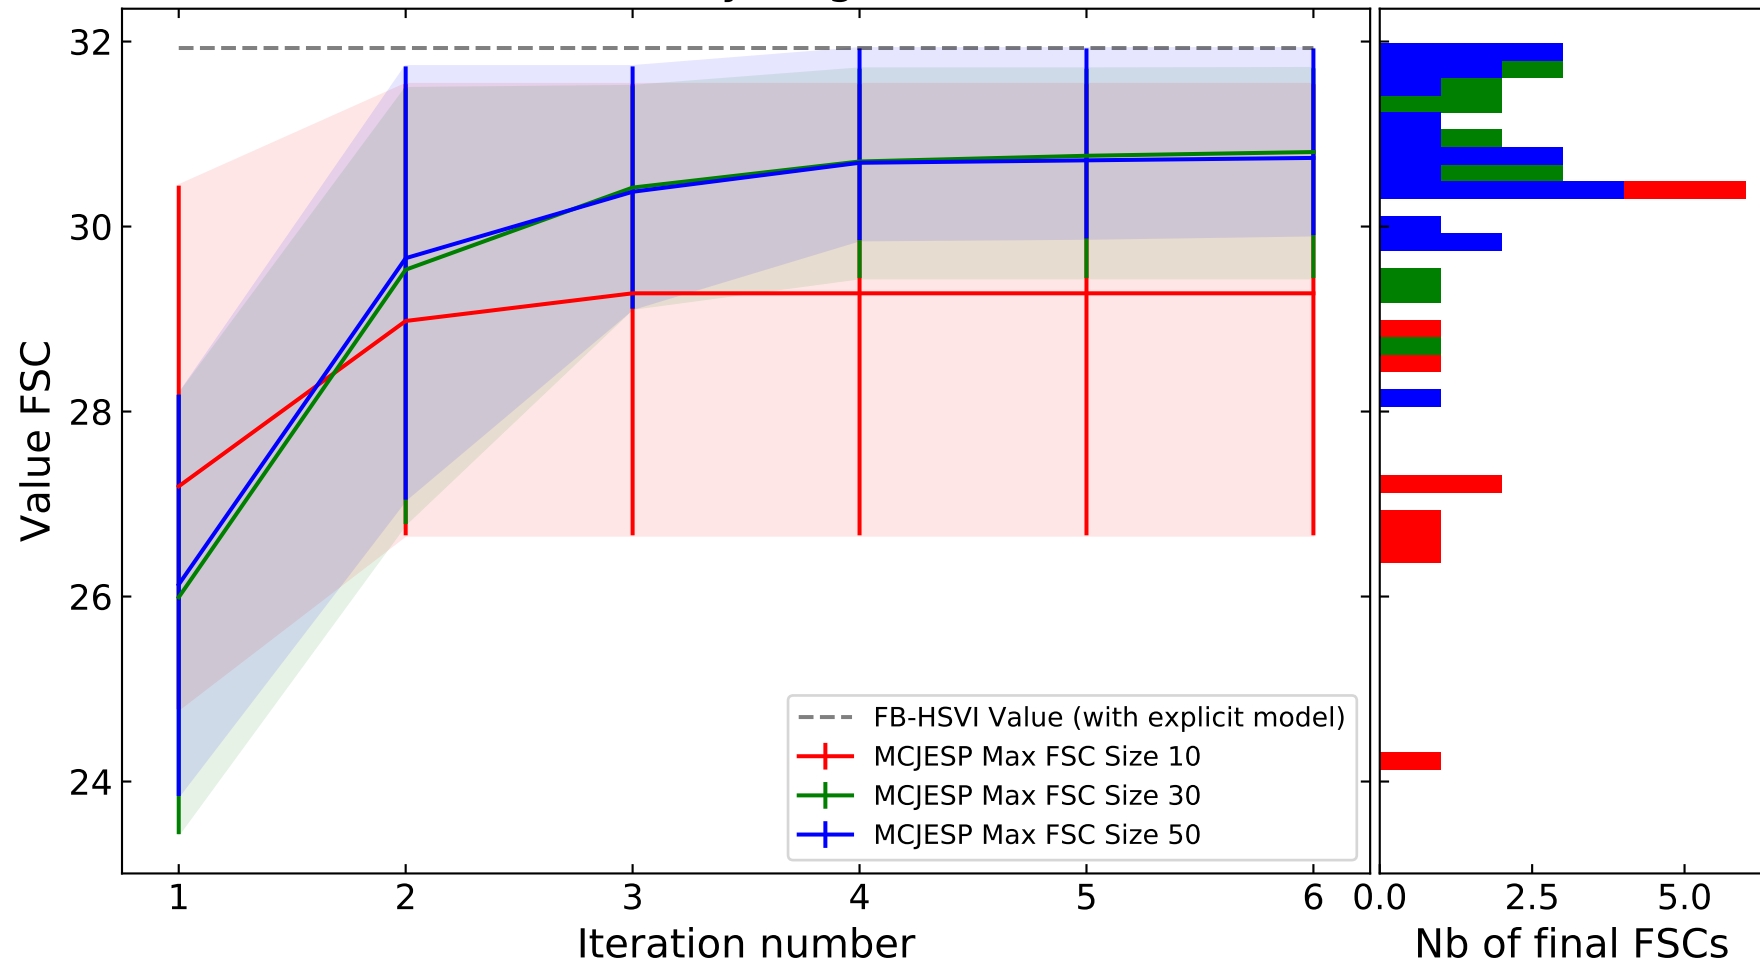

Supplement: supplementary_material [file attachment]
